# Supplementary material
Source: publisher site journal article supplement (https://www.degruyterbrill.com/publication/isbn/9783110248838/downloadAsset/9783110248838_Inhaltsverzeichnis.pdf)
Supplement: Supplementary file 1 [file 9783110248838_Inhaltsverzeichnis.pdf]

## Inhaltsübersicht

|                                                                             |     |
|-----------------------------------------------------------------------------|-----|
| Bearbeiterverzeichnis . . . . .                                             | V   |
| Vorwort . . . . .                                                           | VII |
| Verzeichnis der Abkürzungen und der abgekürzt zitierten Literatur . . . . . | XI  |

## VERSICHERUNGSVERTRAGSGESETZ

### Teil 3

### SCHLUSSVORSCHRIFTEN

|                        |                                                                                                   |     |
|------------------------|---------------------------------------------------------------------------------------------------|-----|
| § 209                  | Rückversicherung, Seeversicherung . . . . .                                                       | 1   |
| § 210                  | Großrisiken, laufende Versicherung . . . . .                                                      | 58  |
| § 211                  | Pensionskassen, kleinere Versicherungsvereine, Versicherungen<br>mit kleineren Beträgen . . . . . | 64  |
| § 212                  | Fortsetzung der Lebensversicherung nach der Elternzeit . . . . .                                  | 69  |
| § 213                  | Erhebung personenbezogener Gesundheitsdaten bei Dritten . . . . .                                 | 75  |
| § 214                  | Schlichtungsstelle . . . . .                                                                      | 104 |
| § 215                  | Gerichtsstand . . . . .                                                                           | 117 |
| § 216                  | Prozessstandschaft bei Versicherermehrheit . . . . .                                              | 145 |
| Anh § 216              | Mitversicherung . . . . .                                                                         | 161 |
| Int. VersR             | Internationales Versicherungsvertragsrecht . . . . .                                              | 219 |
| Sachregister . . . . . |                                                                                                   | 357 |
